# Supplementary material for: Global and Phylogenetic Distribution of Quorum Sensing Signals, Acyl Homoserine Lactones, in the Family of Vibrionaceae
Source: PubMed Central journal article supplement (PMC4245543; doi:10.3390/md12115527), 2014-11-20
Supplement: marinedrugs-12-05527-s001.pdf [file marinedrugs-12-05527-s001.pdf]

## Supplementary Information

**Table S1.** Screening for general AHL response using AHL standards in well assay against *C. violaceum* (*Cv*) and *A. tumefaciens* (*At*) with three 10-fold dilutions; +++ strong, ++ medium, + weak, – no response. HSL = homoserine lactone.

| Name                                                               | Concentration of Dilutions in $\mu\text{mol L}^{-1}$ for <i>Cv</i> Assay |      |      | Concentration of Dilutions in $\mu\text{mol L}^{-1}$ for <i>At</i> Assay |      |      | AHL Response in Extract Well Assay |           |           |           |           |           |           |
|--------------------------------------------------------------------|--------------------------------------------------------------------------|------|------|--------------------------------------------------------------------------|------|------|------------------------------------|-----------|-----------|-----------|-----------|-----------|-----------|
|                                                                    | FW                                                                       | 1    | 1:10 | 1:100                                                                    | 1    | 1:10 | 1:100                              | <i>Cv</i> | <i>Cv</i> | <i>Cv</i> | <i>At</i> | <i>At</i> | <i>At</i> |
|                                                                    |                                                                          |      |      |                                                                          |      |      |                                    | 1         | 1:10      | 1:100     | 1         | 1:10      | 1:100     |
| C4-HSL; <i>N</i> -Butyryl-DL-HSL                                   | 171                                                                      | 4089 | 409  | 41                                                                       | 4089 | 409  | 41                                 | +++       | ++        | –         | –         | –         | –         |
| C6-HSL; <i>N</i> -Hexanoyl-DL-HSL                                  | 199                                                                      | 50   | 5.0  | 0.50                                                                     | 5019 | 502  | 50                                 | +++       | ++        | –         | +++       | ++        | –         |
| C8-HSL; <i>N</i> -Octanoyl-DL-HSL                                  | 227                                                                      | 44   | 4.4  | 0.44                                                                     | 4.4  | 0.44 | 0.044                              | ++        | +         | –         | +++       | +++       | –         |
| C10-HSL; <i>N</i> -Decanoyl-DL-HSL                                 | 255                                                                      | 3133 | 313  | 31                                                                       | 39   | 3.9  | 0.39                               | +         | +         | –         | +++       | +++       | –         |
| C12-HSL; <i>N</i> -Dodecanoyl-DL-HSL                               | 283                                                                      | 3176 | 318  | 32                                                                       | 353  | 35   | 4                                  | +         | –         | –         | ++        | ++        | –         |
| C14-HSL; <i>N</i> -Tetradecanoyl-DL-HSL                            | 311                                                                      | 3211 | 321  | 32                                                                       | 3211 | 321  | 32                                 | –         | –         | –         | ++        | ++        | ++        |
| C18-HSL; <i>N</i> -Octadecanoyl-L-HSL; oDHL                        | 367                                                                      | 2721 | 272  | 27                                                                       | 2721 | 272  | 27                                 | –         | –         | –         | ++        | –         | –         |
| 3-OH-C4-HSL; <i>N</i> -(3-Hydroxybutyryl)-L-HSL; HBHL              | 187                                                                      | 5342 | 534  | 53                                                                       | 5342 | 534  | 53                                 | +         | –         | –         | ++        | ++        | –         |
| OH-C6-HSL; <i>N</i> -(3-hydroxy-hexanoyl)-L-HSL                    | 215                                                                      | 4.6  | 0.46 | 0.05                                                                     | 46   | 4.6  | 0.46                               | +         | –         | –         | ++        | ++        | –         |
| OH-C12-HSL; <i>N</i> -(3-hydroxy-dodecanoyl)-L-HSL                 | 299                                                                      | 3340 | 334  | 33                                                                       | 3.3  | 0.33 | 0.033                              | ++        | +         | –         | ++        | ++        | –         |
| O-C4-HSL; <i>N</i> -(3-Oxobutyryl)-L-HSL; OBHL, 3-oxo-C4-HSL       | 185                                                                      | 5400 | 540  | 54                                                                       | 5400 | 540  | 54                                 | +++       | +         | –         | ++        | ++        | –         |
| O-C6-HSL; <i>N</i> -(beta-Ketocaproyl)-L-HSL                       | 213                                                                      | 47   | 4.7  | 0.47                                                                     | 4.7  | 0.47 | 0.047                              | +++       | +         | –         | ++        | ++        | –         |
| O-C8-HSL; <i>N</i> -(3-oxo-Octanoyl-L)-HSL                         | 241                                                                      | 41   | 4.1  | 0.41                                                                     | 4.1  | 0.41 | 0.041                              | +++       | +         | –         | +++       | +++       | +++       |
| O-C10-HSL; <i>N</i> -(3-oxo-decanoyl-L)-HSL                        | 269                                                                      | 371  | 37   | 3.7                                                                      | 3.7  | 0.37 | 0.037                              | +         | +         | –         | +++       | +++       | ++        |
| O-C12-HSL; <i>N</i> -(3-oxo-dodecanoyl-L)-HSL                      | 297                                                                      | 336  | 34   | 3.4                                                                      | 3.4  | 0.34 | 0.034                              | –         | –         | –         | +++       | +++       | ++        |
| 6-Ph-3-oxo-C6-HSL; <i>N</i> -(6-Phenyl-3-oxohexanoyl)-L-HSL; PhOHL | 289                                                                      | 346  | 35   | 3.5                                                                      | 3.5  | 0.35 | 0.035                              | +         | –         | –         | +++       | +++       | +++       |

**Figure S1.** World map with sampling sites of the AHL-positive *Vibrionaceae* strains and approximate climate zones. Geographic data is available in Table 1. Map data ©2014 Google.

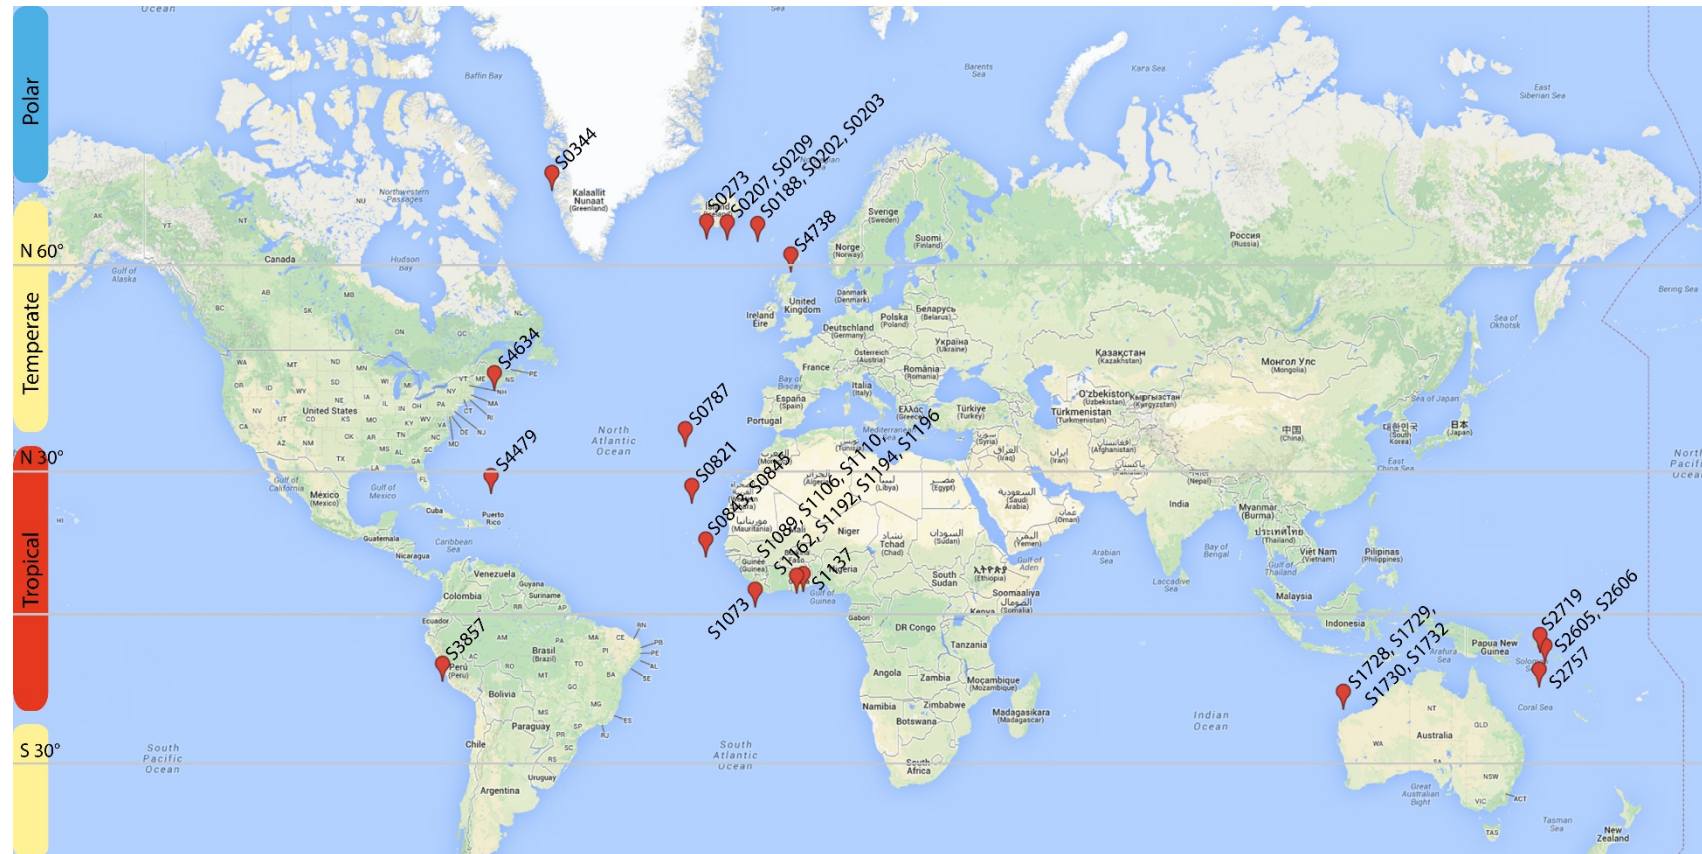

© 2014 by the authors; licensee MDPI, Basel, Switzerland. This article is an open access article distributed under the terms and conditions of the Creative Commons Attribution license (<http://creativecommons.org/licenses/by/4.0/>).
